# Supplementary material
Source: Hindawi journal article supplement (doi:10.1155/2011/360954)
Supplement: f1 [file 360954.f1.doc]

Supporting information for the manuscript:

**A structurally variable hinged tetrahedron framework from DNA origami**

David M. Smith,1 Verena Schüller,1 Carsten Forthmann,2,3 Robert Schreiber,1 Philip Tinnefeld,2,3,4 and Tim Liedl1,4

1*Physik weicher Materie und Biophysik, Ludwig-Maximilians-Universität, 80539 Munich*

2*Angewandte Physik-Biophysik, Ludwig-Maximilians-Universität, 80539 Munich*

3*Physikalische und Theoretische Chemie-NanoBioScience, Technische Universität Braunschweig, 38106 Braunschweig*

4*Center for NanoScience, Ludwig-Maximilians-Universität, 80799 Munich*

[david.smith@physik.uni-muenchen.de](mailto:david.smith@physik.uni-muenchen.de); tim.liedl@physik.lmu.de


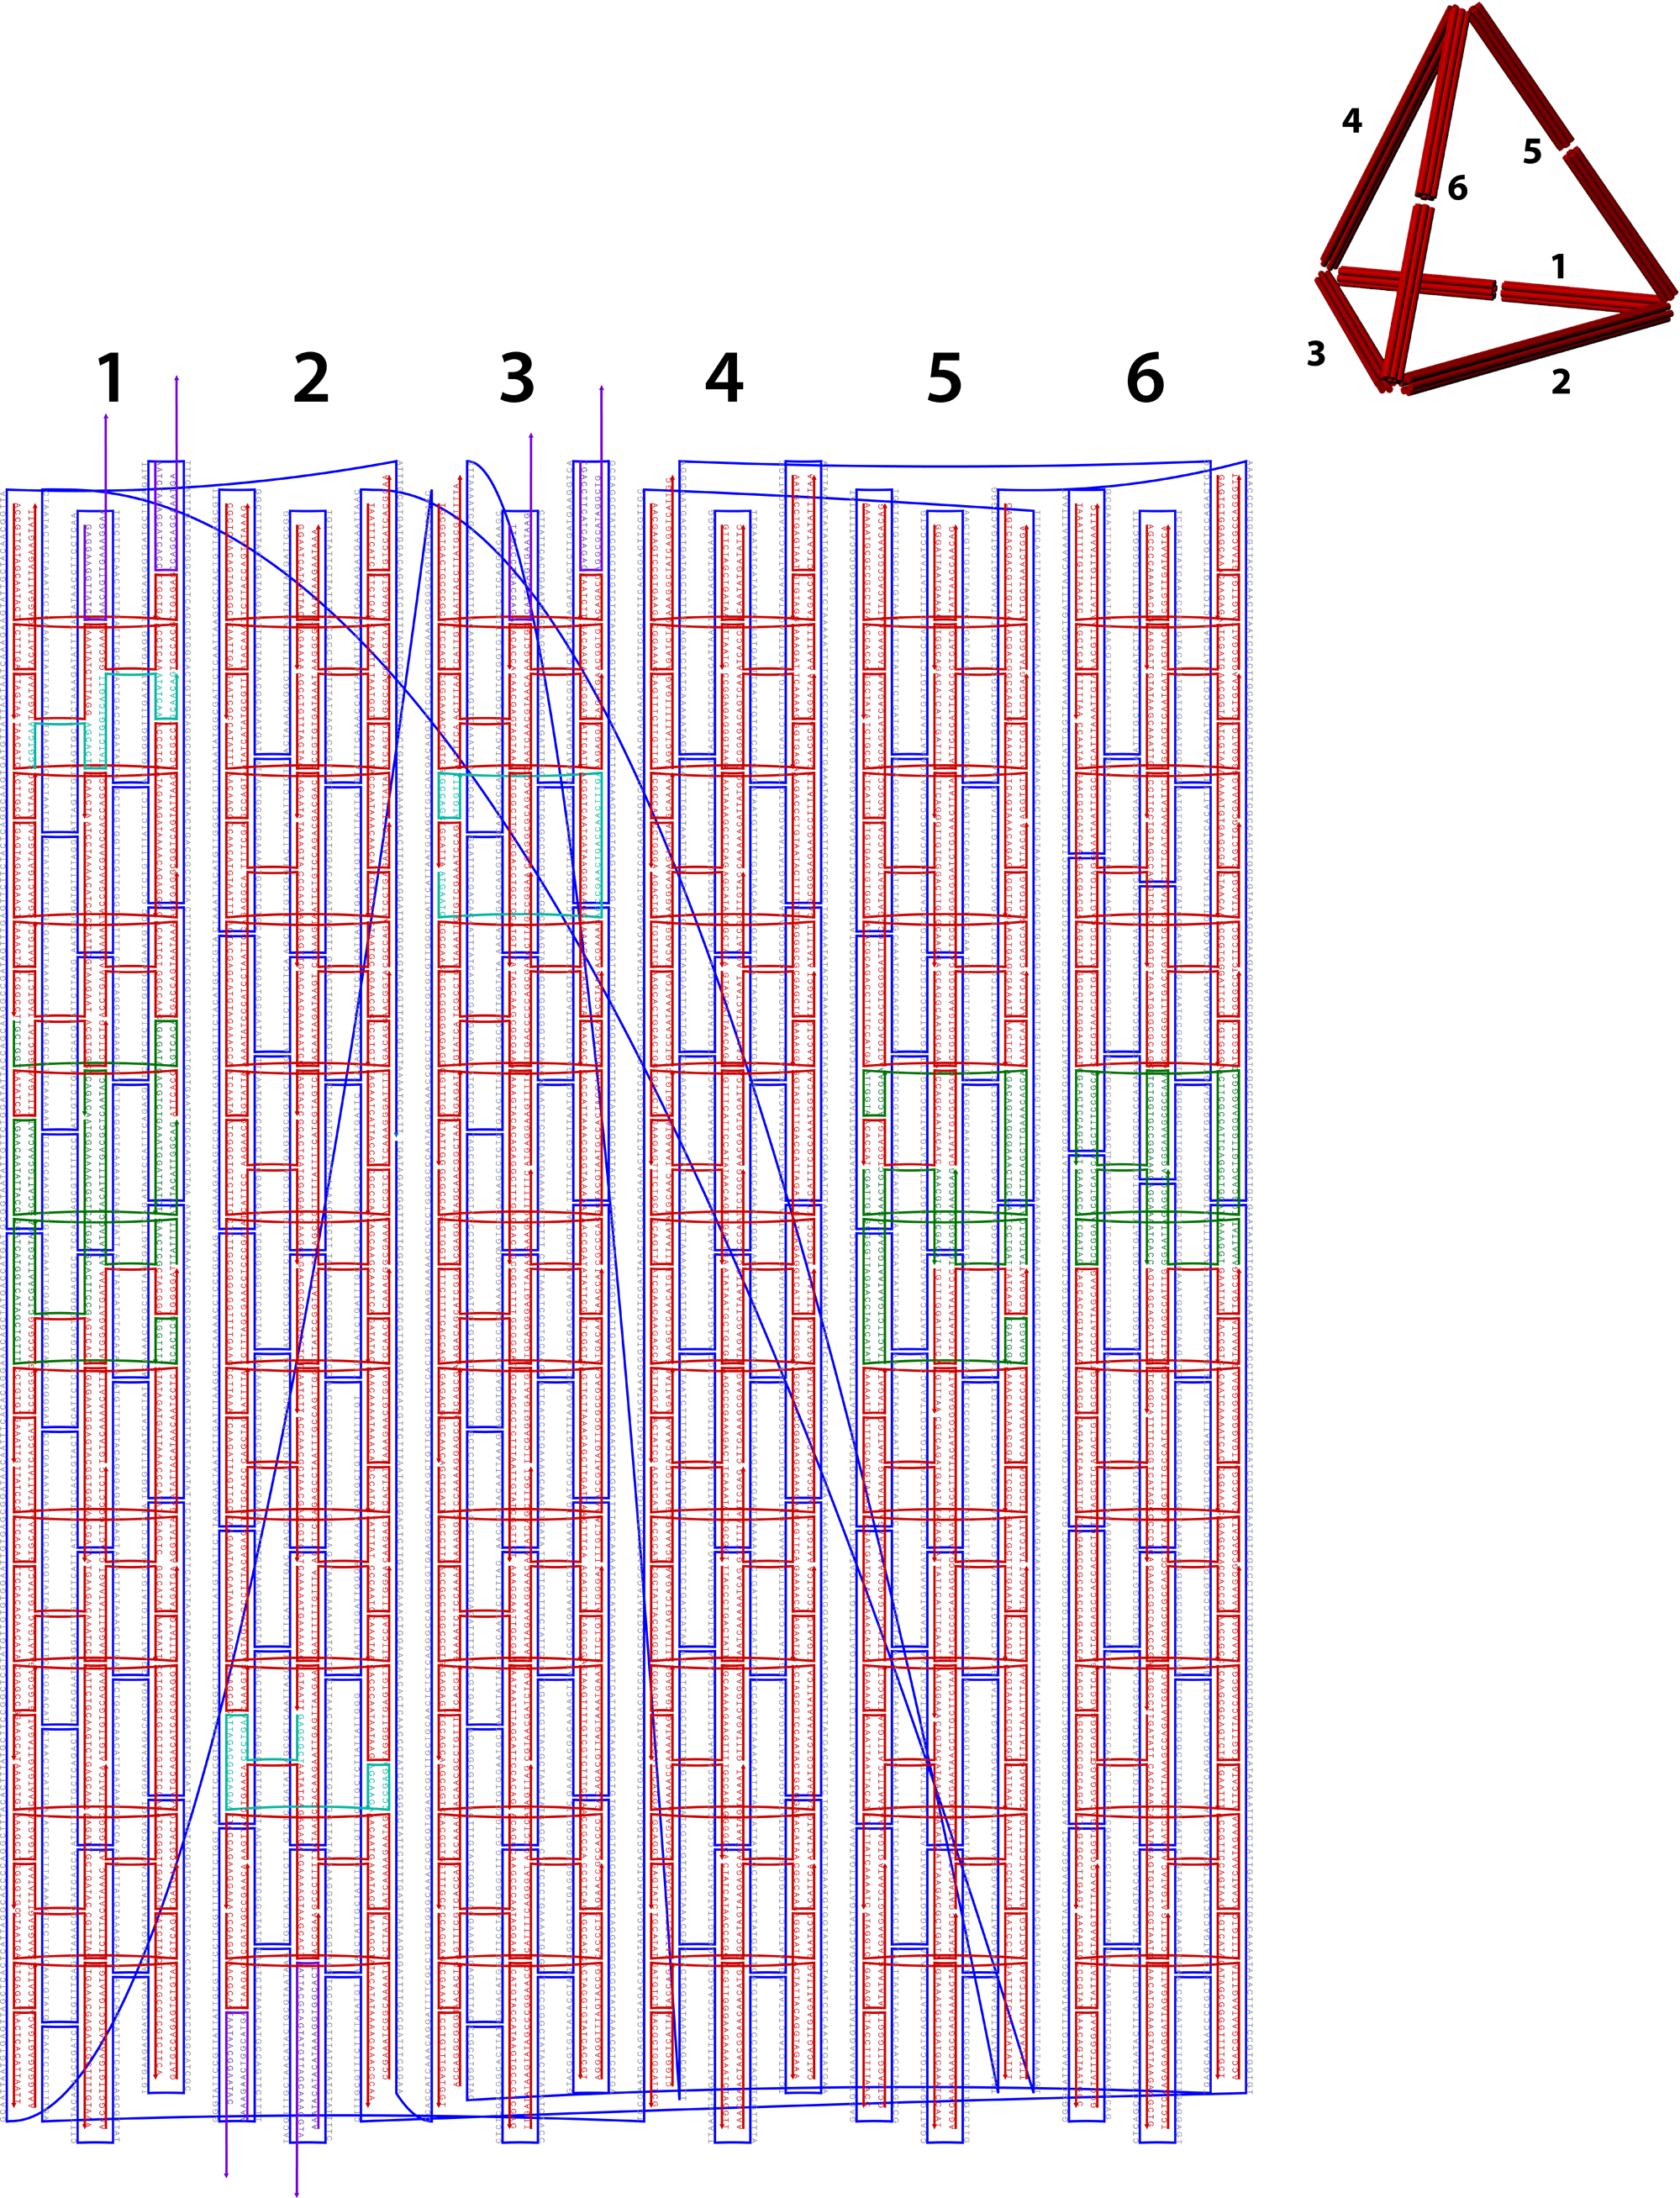


Figure S1: DNA origami tetrahedron design. Strand diagram with scaffold path (blue) and sequence of staple oligos for DNA origami tetrahedron is shown. Green-labeled trands span gap regions on struts 1, 5 and 6, and are selectively omitted to generate the varied open configurations. Strands in purple have been selected for 3’ extension with handle sequences for biotin attachment. Light-blue labeled strands are extended at the 3’ end with short sequences for transient hybridization of oligos attached to ATTO655 molecules for PAINT measurements.


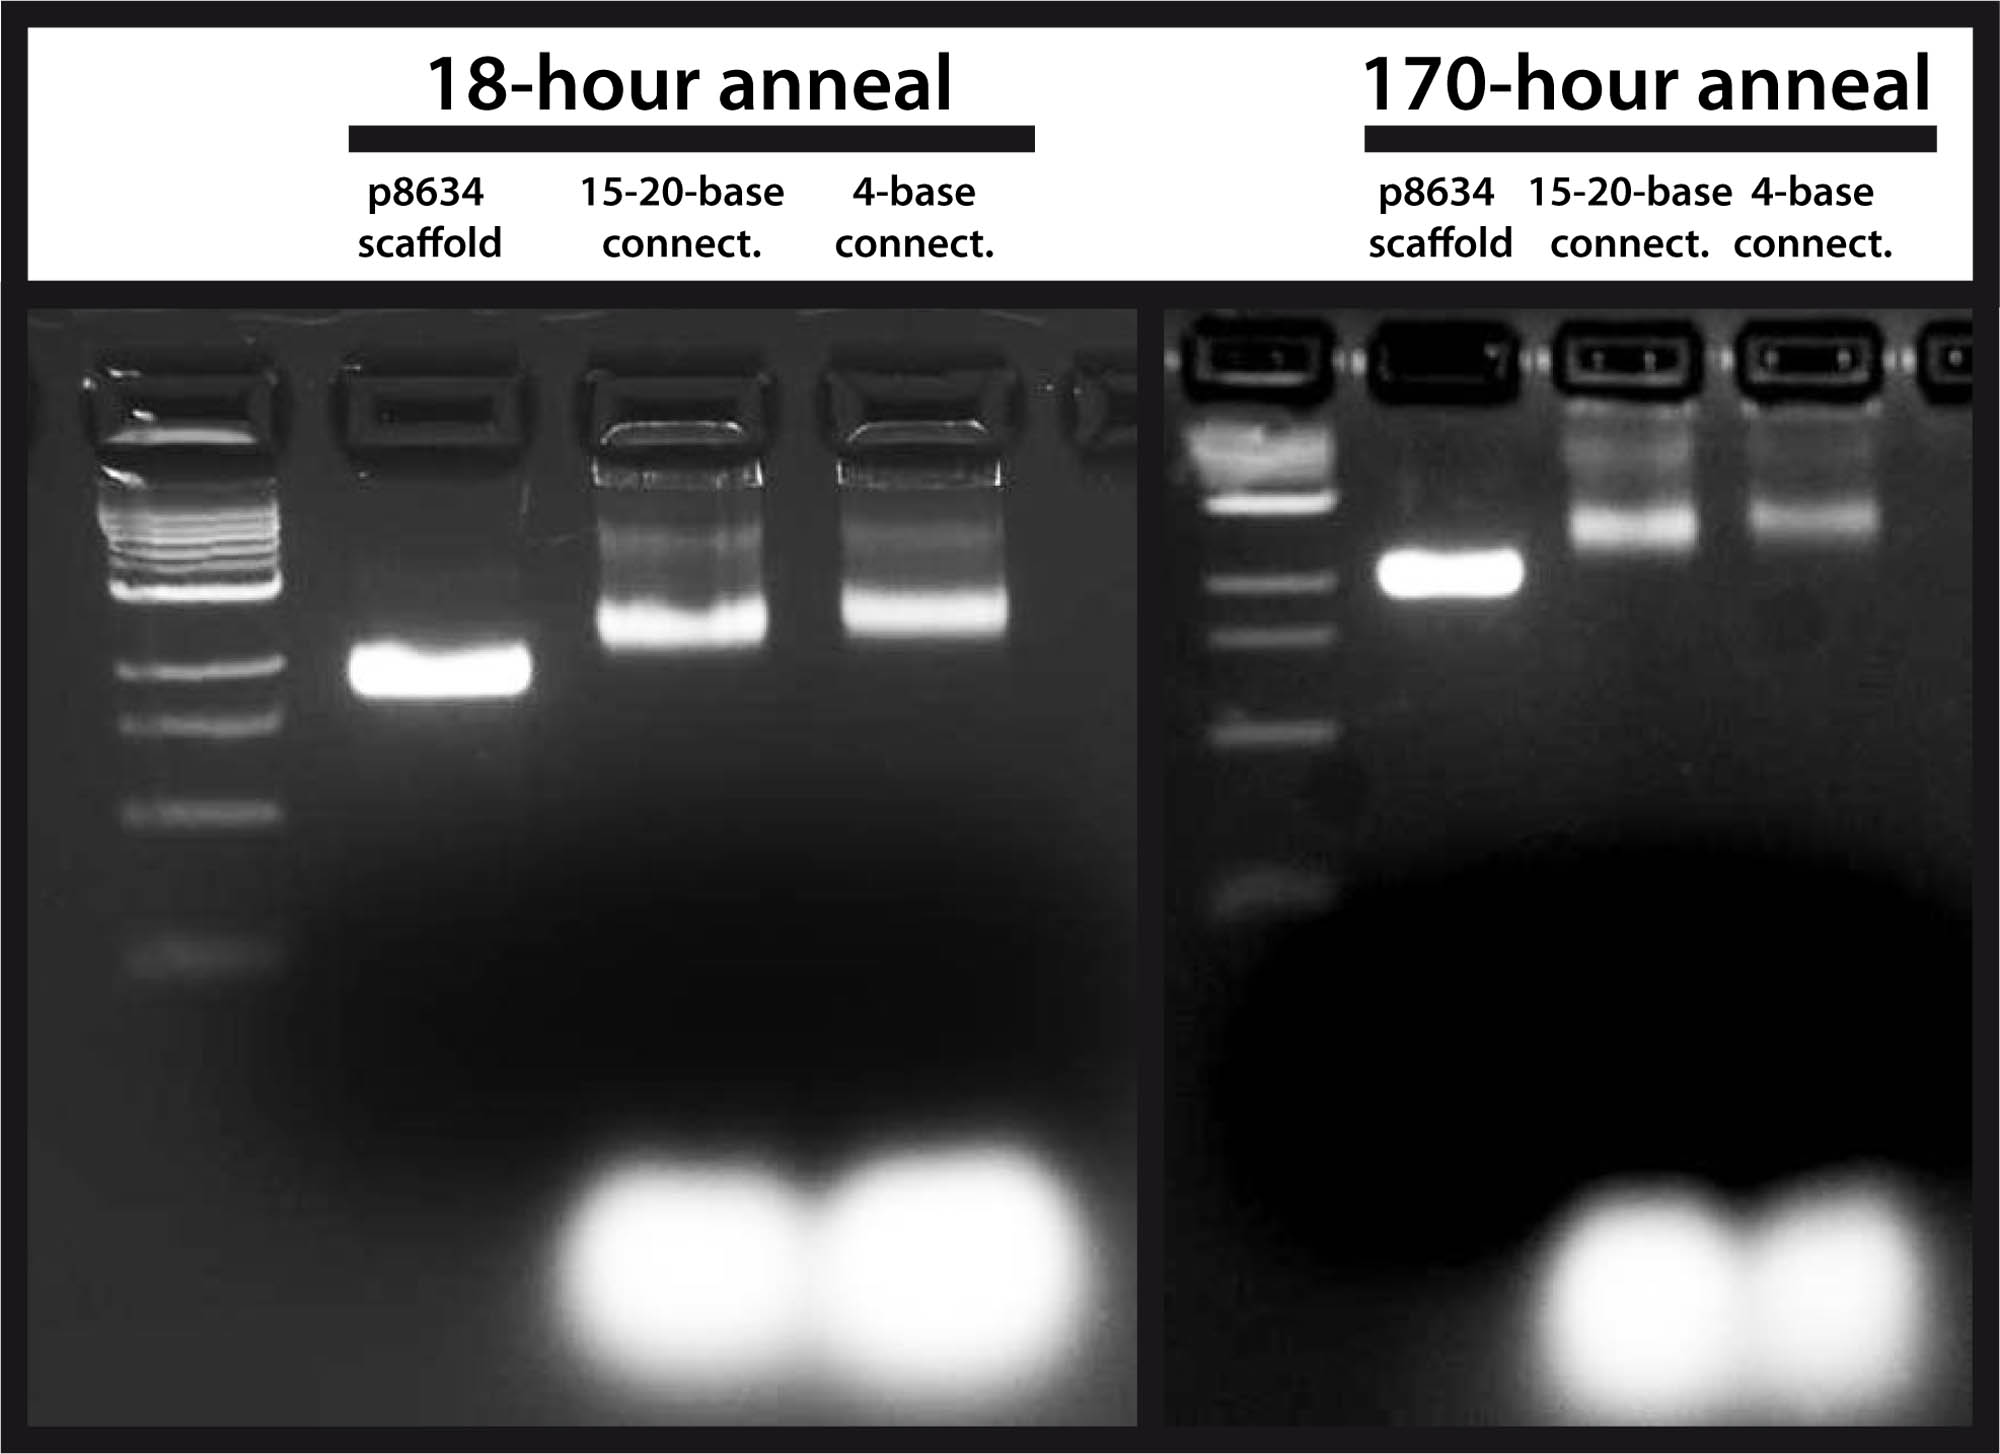


Figure S2: Agarose gel separation of full tetrahedral folded for (left) 18 hours and (right) 170 hours. In each, lanes 1-2 contain 1kb ladder and the circular p8634 scaffold, respectively. Lane 3 contains tetrahedra with a four-base single-stranded connection between adjacent struts, while lane 4 contains tetrahedral with longer single-stranded connections ranging from 15-20 bases. Gels are 2% agarose and run at constant 70V over 22 cm for approximately 3 hours.

Oligonucleotide sequence. Staples spanning gap regions in the struts are marked. Extended staples for biotin attachment, transient hybridization of ATTO655-conjugated oligos along with ATTO655- and biotin-modified oligos are given at the bottom.

| Oligo1 | CTAATGATGTCAGATATCTTACTTTCGCGTCGTCTTCA |
| --- | --- |
| Oligo2 | ACCGTTGTAGCAATACTCTGAGAGTTGCTGA |
| Oligo3 | AAAGGAGAGTGACAAACTCACATTAATT |
| Oligo4 | AACGCTTGTGAAAATGCTGAATGTCTGAAACGAGATCGGTTTTGTAAA |
| Oligo5 | GATGCCAGAGTCTGTAGGTGAGCTTACATTG |
| Oligo6 | TGCCACGTCTTTGATACATTTGAGGATTTAGAAGTATT |
| Oligo7 | CCGAGGACCTTATAAATAGCTATACATATAAAAGAAACGCAA |
| Oligo8 | CGCTCAACAGTAGGGCTAAGAGTCTTCTGAC |
| Oligo9 | GGAATCATAATTACTAAATAAGAATAAA |
| Oligo10 | TAATTTCATCTGTCCATCACGCAA |
| Oligo11 | CCGAAATCGGCAAAATCAACGCAATTAAGACTCGATAGCCGAACA |
| Oligo12 | CGAGTAATAATTGAATACAAATTCTTACCAGTATAAAG |
| Oligo13 | CCAGCAGCACCCTCAGCCACCACTAGGTGTATCACCGT |
| Oligo14 | TGCGCTCACTGCCCGCTACAGACCTAATCTT |
| Oligo15 | ACCAGGCGGGTTCCTGTTTGATGGT |
| Oligo16 | TTGATATAAGTATAGCCCGGAACCCCATGTACCATAAGTGCCGTCGAG |
| Oligo17 | AGGAGGTTTAGTACCGCGCGAAAAAACACTG |
| Oligo18 | ACGGTGTTTCCAGTTCATTGTGAATTACCTTATGCGATTTTA |
| Oligo19 | TGCATATGAATACCAGGAATTACTATTACAGGTAGAAA |
| Oligo20 | AACGAAGTCCGTGAAGATAGAACCGTGTAGG |
| Oligo21 | CTGGCTCATTAGACGCTGGCATTCG |
| Oligo22 | GTTCTAGCTGATAATCAATATGATATTC |
| Oligo23 | AAACGAACTAACGGAACAACATGAACGTTGGGAAGAAAAATCTACGTT |
| Oligo24 | AATGCCTGAGTAATCTCATATATTTTAA |
| Oligo25 | CATCAGTTGAGATTTAGGATGTCTTACCAGT |
| Oligo26 | AAATTTTCGGAAACAGATCTACAAAGGCTATCAGGTCATTGC |
| Oligo27 | ATAGGTCAACTCGTAATCCTTGATTTTCAAATATATTT |
| Oligo28 | AAAAATGCGCCGCCTGAATTGCTAAACTGGA |
| Oligo29 | GCTTAGGTTGGGTTCTACCTTTTTAACC |
| Oligo30 | GGGATTAATGAAAGGTATTAACCAACAG |
| Oligo31 | AGACAAAGAACGCGAGAAAACTAATGTAAATGCTGATGCAAATCCAAT |
| Oligo32 | CAGTCACGACGTTGTAAAACGACGCTCATGCATGGCAG |
| Oligo33 | TTTACAAACAATTCGACTGAGAGAATATAACTAGAAGAGTCAATA |
| Oligo34 | TAAGCGTACCACCATAGAAGAATTACAGCGCAACACAG |
| Oligo35 | AACAGTGTTTTGTCCGTCATACATAGCGGGGTTTTGCT |
| Oligo36 | TAAATTTTTGTTAAATCAAGTTGGCAAGAGA |
| Oligo37 | GCCTATTTCGGAACAAACAGTTAATGCC |
| Oligo38 | AGCCCCAAAAACAGCCGGTTGATAATCA |
| Oligo39 | TCCTCAAGAGAAGGATTAGGATTGAAACATGAAAGTATTAAGAGGCTG |
| Oligo40 | GAGTCTGGAGCAAAGTAACGCCAGGGTT |
| Oligo41 | ACCACGGAATAAGTTTACCCGTATCTATTATTCTAAGTTTTAACG |
| Oligo42 | GGCGATTAGCTCATAACGTTAATATTTTGTTAAAATTC |
| Oligo43 | GAGGAAGGTTATCTCAACAGTTGAAAGG |
| Oligo44 | TCTAAAGCATCACCCCAGCAGCAAATGA |
| Oligo45 | AAATACATACATAAAGGTGGCACTTATTACGCAGTATGTTAGCAAACG |
| Oligo46 | ACCTTCATCAAGAGAGGCGCATAGGCTG |
| Oligo47 | AAGAACTGGCATGATAATAACGGAATAC |
| Oligo48 | TTGCCCTGACGAGATCATTCAGTGAATA |
| Oligo49 | AAAGTGTAAATGCAGACATCACGAAGGTCGAGCCGGTGCGAG |
| Oligo50 | TTATCCGGAATATTACATAACAATCCTCCCTGTGTCCCCGGG |
| Oligo51-Gap1 | GCCATTGCAACAATAGAACAATATTACCATTTACATTGGCAG |
| Oligo52 | CCGTCAAAGCACTAATATCTGGTCAGTTATATCAAGCAACAG |
| Oligo53 | AAGATTGCTGATACTTTATAAGGGGTGC |
| Oligo54-Gap1 | ATGGAAAAACGCTCATGGAGCACTTCCGCTCGAATTCGTACA |
| Oligo55 | ATCCTAAAACATCGCCATTCGTAAGAATTAGTCTTTCGGCCT |
| Oligo56 | ACCTGAAGGCCAACCGACCAGTAATAAACAAACTATAATGCG |
| Oligo57 | CGTACTCAAAGCCTATGAGTATCAATGAGTTAGATGAAGCAT |
| Oligo58 | AGGTATACTCACAAGTGCAAAATTATTATCACGATGAAATTG |
| Oligo59 | CGGTCAGTATTAACACTTGCCATTAGAG |
| Oligo60 | CATATTTATCAGTGTTGAAATACCAATAAACAACAGAAGTGT |
| Oligo61 | GAGCGCTCCCTGAAATTAGACGGGAGAACCCGAGAAGCAAGA |
| Oligo62 | ACCAACGCAGCTACTCAAGATTAGTTGCCCACTATGCCATAT |
| Oligo63 | AACGCGAGGCGTCTCTTATCCGGTATTCCAAATCATCAAAGG |
| Oligo64 | GCACTCAAAGAACGATCGGCTGTCTTTCACCGTCTCGCCCAA |
| Oligo65 | AACAAGAAAAATCCAACAATAGATAAGTAGAACGCAACGGTA |
| Oligo66 | TAAAGTATTTTCGACCAACATGTAATTTATCCTGATGTTCAG |
| Oligo67 | AGCCTGTTTAGTAAACCGTGTGATAAATTAATGGTAGGCCAC |
| Oligo68 | CAAGAGTTAAGAATAACATAAAAACAGGGTTCCAGCAAATAA |
| Oligo69 | GCGAAAACTCTTGCGGGAGGTTTTGAAGTCCAACGGATATAG |
| Oligo70 | CGCCAGAAGTACGAGCATGTAGAAACCAAGACAGGGCCTGTT |
| Oligo71 | AGCGGTCCACAGACGTTAGTAAATGAATAGAGAGTTCACGTT |
| Oligo72 | GCTGATTAAACCGATAGTTGCGCCGACATGAGACGGCAGCGA |
| Oligo73 | GCGCCAGGCTACGTAATGCCACTACGAAGGTTTGCGGAGATT |
| Oligo74 | ATGAATCAGCCGAACTGACCAACTTTGATGCCAGCATGGTTT |
| Oligo75 | ACAGCCAAGCCCAATCACCAGGTTTGCC |
| Oligo76 | TTCGAGGTGAATGCCGTCACCCTCTTTAATTGTATCGGTTCT |
| Oligo77 | ATGAGGAAGTTTTCCAAAGTACACAGAGGCTTTGAGGACTGC |
| Oligo78 | CCACCCTCACGCTGTACAAACTACAACGCCTGTTTTGCAGCA |
| Oligo79 | TTTGCTAGCCCTTCAAAAGGCTCCAAAAGGAGCCAGGCAACA |
| Oligo80 | CGCCCACGGTGGTTACGAGGGTAGCAACGGCTAACGTATTGG |
| Oligo81 | ACGAAAGGGCCAACATAAATTGTGTCGAAATCCAGTGCATTA |
| Oligo82 | TTCAGGACAGAATCGTCATAAATATTCATGGAGGTCGAGAGG |
| Oligo83 | ACATCATTATCCAACAGGTCAGGATTAGGTTAGTAAGATTAA |
| Oligo84 | TTCTGCGTTACATTTCGCAAATGGTCAATGACCTGCGGTGTC |
| Oligo85 | AGACTCCCAGCGGGAGAAGCCTTTATTTTCGCCATGCAAAAT |
| Oligo86 | CTATCATAACCCGGGGCATAGTAAGAGCCGCCAAAACATTCA |
| Oligo87 | GTTTAGACTGGAATTGCAAAAGAAGTTTAAAATAGCAATGGG |
| Oligo88 | CTTCAAAGCGAAGCAAGCCCGAAAGACTATCAAAAACTATCG |
| Oligo89 | AACGAGTAGATTCAAGTTTCATTCCATATAAAGTAGAAGAGT |
| Oligo90 | CAAAAACATTATGGCAATAAAGCCTCAGAGAATTACCTGGGA |
| Oligo91 | AATGCTTTACGCATGCAAAGCGGATTGCTCAAATATCGCGCT |
| Oligo92 | TGCTCCTGCAGTTATTTAAATATGCAACTAACAGTTGATTGA |
| Oligo93 | TCTGCCAATCTCGGCCAAGCTTTCAGTAAACAGAGATTACGA |
| Oligo94 | CAGTACATTTGAAAAAATTAATTACATCCGAACGTATTAAT |
| Oligo95 | CGTCAGAAAATTGCATTTGCACGTAAAATTGCGGATTCGCCT |
| Oligo96 | TGTTTGGATTATCACATCAATATAATCCTATCAGAGCGGAAT |
| Oligo97 | GCAGGCAATGCAAAACTGCGTGAAGCGGCGAAATTAACTCAA |
| Oligo98 | GTTGTCGGAACGAATTGTGAGTGTGGCGCGTGAGTAGGTTCG |
| Oligo99 | ACATCATTGATTTCTATTCGCATTCACCGCCAGTGATGGGAG |
| Oligo100-Gap5 | AGACAGTAGGGAAACTGCGATTCCTGATTGCAGGAGAACGAG |
| Oligo101 | TATCATTCAGATGATGAAACAAACATCAAGTTTGACCAAGTT |
| Oligo102-Gap5 | TATCATCGCGGGTTAGAACCTACCATATAGAAGGATGATGGC |
| Oligo103 | CGAGCAGATACGCAGACCTTTTCCATGAAAATCAAAACTCTC |
| Oligo104 | TTACCATTAGCAAGCAGCACCGTAATCAGTAAATACACCGTC |
| Oligo105 | CCTCGTAACCGTGCGGCCTCAGGAAGATATCGGTGCGTGGGA |
| Oligo106 | TGATATTTTGAGGCAGCCGCCGCCAGCAATTCATATGAATTT |
| Oligo107 | GAACCGCCACCCGATCAGAGCCGCCACCCCACCGGAAAAGGG |
| Oligo108 | TTTTCGGAGACTGTCAGAATCAAGTTTGCAACCGACGGAACC |
| Oligo109 | AGTAGCACCATTTCACTTGAGCCATTTGGAATTATTTGACGG |
| Oligo110 | TAGATGGGCGCAGCACGGCGGATTGACCGATTCTCCGGGCCT |
| Oligo111 | GTATAAGCAAATTGAGCATGTCAATCATAACGGTAGCTGCAA |
| Oligo112 | CGACATTCCAGAGCCGCCACCAGAACCACAAAGACAACCGCC |
| Oligo113 | CGAAAGGGAACGCCATCAAGGACGACGAATTACGCGTAACAA |
| Oligo114 | TACCGAGAGTCACATATGGAGATGATAACTACGGCCGGGGAT |
| Oligo115 | CGAACTGATAGCAGTGAGTAGAAGAACTAGTGAGG |
| Oligo116 | ATGTTGTGCAGAATCATTCTGCAAGTCTGAGCAAA |
| Oligo117 | ACCTCAAGGCAAATAAAATATCTTTAGGTAGATAATTAGTAA |
| Oligo118 | ATTCACCAATATCCTTTTGAATGGCTATACGTGGCCCTTCTG |
| Oligo119 | CAAAAATGAAAAAGCGATTTTTTGTTTACCCAATCTTTGGAA |
| Oligo120 | GCCCTTTAAATAGCAATCAAAAGAATAGTTACCAGAAGGAAA |
| Oligo121 | AAACAAAATAAACATAAAGAACGTGGACCCTTAAAAATTTTA |
| Oligo122 | CTAAATTAAGGCGTTAGAAAA |
| Oligo123 | AGTTTCGTAGGAACTCATTTTCAGGGATCCCTCAGAGAACCG |
| Oligo124 | AATTTCATAGTAAAAAATCAACGTAACAACCGGATCAGATGA |
| Oligo125 | CGTAACGATCTAGATAATAATTTAGCATTCCACAG |
| Oligo126 | CGAGGCGCAGACCCTTGGGCTTGGCGACCTGCTCCATGTTTA |
| Oligo127 | GACAAGAAAGCTGCAACACCA |
| Oligo128 | CATCGTTTACCAGAGAGTATC |
| Oligo129 | CCGGAGAGGGTAAGCCGGAGACAGTCAATCAAAAGAGGATAA |
| Oligo130 | TAAAGATATCACCAATTAATG |
| Oligo131 | ACTAATGTGCAGGTCGACGATAAAAACCTGCCAGAGGGGGCA |
| Oligo132 | ATATTTTTGTTATCTACAGGCAAGGCAAAGCATAAAGCTATA |
| Oligo133 | GTGAAAACAATTTCATAAATCAATATGATTAAGACGCTGATAACATAGC |
| Oligo134 | TATTCATTTCAATTAATCGCGCAGAGGCTTGAATAGTAACAT |
| Oligo135 | GATTGCTGAAACAGTACCTTTTACATCGGGAGATTGGTTTAA |
| Oligo136 | GGGTCGACAGGAGGCACAAACAAATAGAGTGTACTGGTAATGGCTTTTG |
| Oligo137 | ACCGTTCAGAATCCTCATTAAAGCCAGAATGGACCTTGGCCT |
| Oligo138-Gap6 | ACTTCGCCATTCAGGCTGCATTAAAGGTGGAATTAGAGCCCA |
| Oligo139 | ATCGATGATGTACCGAAGATT |
| Oligo140-Gap6 | GAAACCATCGCAACTGTTGGGAAGGGCGCGCACTCCAGCCAT |
| Oligo141 | ACTCAGAGCCACCACCCTCTTTAGCGTCTCATAGCCCCCTCA |
| Oligo142 | TGTAGCCGGAAATAATTCGCGTCATTTAAATTGTATTTTTAA |
| Oligo143 | ATGATACCAGTAAGACAATCAATAGAAATTAGTGCCTTGAGT |
| Oligo144-Gap6 | GGCAAAGCGCCAAATTCTGGTGCCGGAACAAGCTTTCCGGCA |
| Oligo145-Gap1 | TGCTGGTAGTCACAAGAGATAGACGTCTGAAATGGATTATCT |
| Oligo146 | TAACATCACCGCCTACCCTCAATAGAAGATAAAACAGAGGGG |
| Oligo147 | CAAGGAGCGTTTAGTTCTTTACATAAACTGAGTATTGATGAC |
| Oligo148 | AAATGACAAATCCCGAAGGTTTATAAGTGGCATACTAGATGA |
| Oligo149 | TGAAGACTGATACCTTCCACACAACATAGTTTATGAAATATT |
| Oligo150 | TGTACAAAACATTTGGAGAATGGAGTACGGTGGAAACGATAA |
| Oligo151 | CCTCCGGTGTCTTGTCTCCACATCGGGTATTGGGCGTTATCA |
| Oligo152 | GTATAGATGATTAAACCCATATAGAGTCCTACTTGCCCTCTC |
| Oligo153Gap1 | GAACTCGATAATACCTACATTTTGACGCTCAATACACAGACA |
| Oligo154 | ACATTCTAGAAAAATACCGAACGAACCACCAGCCAACAACTA |
| Oligo155Gap1 | TTATTTTGCATCATGGTCATAGCTGTTTGCACTCGGGGTTTT |
| Oligo156 | AAGTTAACTGAACAAATATCAGAGAGAAGAAAAGTAAGCACTTACCGAA |
| Oligo157 | AGTAGCAGCCTTTACAGAGTTTTGCACCCTAACGAGCGTCGT |
| Oligo158 | TCTTTAGCGAACCTCCCGATATCATTCCTCGAGAACAAGCAG |
| Oligo159 | AAAATATCCCATCCTAATTGCAGAGGCACCGACAAAAGGTTG |
| Oligo160 | AACAATGTTATAACCCACAAGAATTGAGTTAAGAAGGTAATT |
| Oligo161 | GACCCAATAATAAGTAGGGTTGAGTGTTGAAGCGCCAAAGTC |
| Oligo162 | TATTTATACTTTCCAGAGCCTAATTTGCCAGTTGGGAATCTT |
| Oligo163 | TAGCAAGTAAAGCCGTTTTTATTTTCATCGTAGTCAAGTACC |
| Oligo164 | TAGAATCATTACCGATCAAAGGGATTTTATCAATAGGTATTA |
| Oligo165 | CTAATGCCCAAAGTAATTCTGTCCAGACGACGACGGAGAATA |
| Oligo166 | TTTTATAAACAACGGCCAGTAATATCATATGCGTTGAATCGC |
| Oligo167 | GAAAATCTTGCGAAGAATAGAAAGGAACACAGTTTATGGGAT |
| Oligo168 | AAGACAGGCGGGATTTGCAGGGAGTTAAATATTCGCAACCAT |
| Oligo169 | TGTATCACGCGAAATTTGACCCCCAGCGTACACTAACCTAAA |
| Oligo170 | AAAGGAATCCAAAAACCGCCTGGCCCTGTTTCTGTCAGCGGA |
| Oligo171 | CGCTTTTCATCGGATTTCTTTTCACCAGATGACAAGTCGCTG |
| Oligo172 | TACCAAGTCGCCTGGCGCGGGGAGAGGCGGCACCAAAACACT |
| Oligo173 | GAACGAGACTTTAACGGGAAACCTGTCGAAGAGGAATTCATT |
| Oligo174 | GTAAGTTTTGTCGTCTTTCGAACCGCCAAGCCTCATAGTTAG |
| Oligo175 | AGTTCTTAAACAGCTTGATCAACTTTCAAATATCAGCTTGCT |
| Oligo176 | CACCATTAAACGGGTAAAAATAACCGATAGAAAGACTTTTTC |
| Oligo177 | ACGGTCAATCATAAGGGAAGCAAAAGAAATACTTAGCCGGAA |
| Oligo178 | CTTTATAGTCAGAACGCTATTACGGGGTTTGAATCAGAATGA |
| Oligo179 | GAAGCTCAACATGTATCGAACAAGACCCAGAGTACTTGCGGA |
| Oligo180 | TGTCCAATAAATCAAAGCACTGCACTGGTAACCTGAAAAGGT |
| Oligo181 | TAGCTATTTTTGAGCAGTTTCTTGTTGTCAACGCAGGTGAGA |
| Oligo182 | TTACCCTGACTATTAAATCAAAAATCAGGAAAACGCCCCTCA |
| Oligo183 | ATATAATGCTGTGGTTAGAGCTTAATTGGTCATTTCTTTAAT |
| Oligo184 | GTAGCATTAACAGATCAATTCTACTAATCGAGCTGTTTAGCT |
| Oligo185 | CCTAGCGTCCAATACTGCGGATACATAAAATAATAGTAAAAT |
| Oligo186 | TGCCAGACCGGAAGCAAACAACAGTTCAGTTTTTAATTCGAG |
| Oligo187 | GGTAGTTTGACCATTAGATTGATAAGAGCTCCCAATTCTGCG |
| Oligo188 | AAGACCCTGTAATACTTTTTTTGGGGCGAGAATCGGTTGTAC |
| Oligo189-Gap5 | CGATTGTATTGTTGAGCTTGAAACAGCAATTGGTAACGGGAA |
| Oligo190 | TTTTACCTGAGCAAAAGAAGAAATAAAGTGAATATACAGTAT |
| Oligo191-Gap5 | TTACTTCTGAATAATGGAATGGAACTGCAAACGCCGCGACAT |
| Oligo192 | AGTGACGACTGGGGATTTGCCGATAGATGACTTGTGCAAGGA |
| Oligo193 | GATAGCTCCCTTAGATTAAATCCTTTGCTTTTTATCAAAATC |
| Oligo194 | GATATTGCGCTAGCACCAGCAATACATCTGGATGAACACCAT |
| Oligo195 | TAATTTTTAATGTGAGTGAATAACCTTGCTTCTAAAATGGAAA |
| Oligo196 | ACGTAAATCGTCGCTTATTAATTTTAAAAGAAAACTTACCTT |
| Oligo197 | AAAACAATAACGGAACAAAGAAACCACCCAAAATTGTAGATT |
| Oligo198 | AAGTGAGCATTGCCAGGAGGATCTGGAACTTATATGTTCAGG |
| Oligo199 | AGGTGTTCTCATTGGACGCCTGGCAGCATCAGAAAGGCTATA |
| Oligo200 | GAAACCATCGCAACTGTTGGGAAGGGCGCGCACTCCAGCCAT |
| Oligo201 | ACTCAGAGCCACCACCCTCTTTAGCGTCTCATAGCCCCCTCA |
| Oligo202 | TGTAGCCGGAAATAATTCGCGTCATTTAAATTGTATTTTTAA |
| Oligo203 | ATGATACCAGTAAGACAATCAATAGAAATTAGTGCCTTGAGT |
| Oligo204 | GGCAAAGCGCCAAATTCTGGTGCCGGAACAAGCTTTCCGGCA |
| Oligo205 | TCAAGCGCAGTCTCTGGTTTACCAGCGCCCACCAGAGGTCAG |
| Oligo206 | ACAATCAAAATCACTTGAGGGAGGGAAGGTAGCGAAGCGCGT |
| Oligo207 | CCCGTCGGTAATGGGATAGCTTTCATCAACATTCTGCCTTCC |
| Oligo208-Gap6 | AAATTATTCGATAGGCCGGAAACGTCACACAGCAAAATCACC |
| Oligo209 | CTTCGCTCAGTATCATCTGCCAGTTTGAAGGTCACGTTGGTG |
| Oligo210 | AGAGCCACTTATTAGCGTTTGCCATCTTTTCATCGATCGGCA |
|  |  |
| Oligo43-biotin | GAGGAAGGTTATCTCAACAGTTGAAAGG**CATTCTCCTATTACTACC** |
| Oligo44-biotin | TCTAAAGCATCACCCCAGCAGCAAATGA**CATTCTCCTATTACTACC** |
| Oligo45-biotin | AAATACATACATAAAGGTGGCACTTATTACGCAGTATGTTAG**CATTCTCCTATTACTACC** |
| Oligo46-biotin | ACCTTCATCAAGAGAGGCGCATAGGCTG**CATTCTCCTATTACTACC** |
| Oligo47-biotin | AAGAACTGGCATGATAATAACGGAATAC**CATTCTCCTATTACTACC** |
| Oligo48-biotin | TTGCCCTGACGAGATCATTCAGTGAATA**CATTCTCCTATTACTACC** |
|  |  |
| Oligo52-PAINT | CCGTCAAAGCACTAATATCTGGTCAGTTATATCAAGCAACAG**TCTTCACC** |
| Oligo61-PAINT | GAGCGCTCCCTGAAATTAGACGGGAGAACCCGAGAAGCAAGA**TCTTCACC** |
| Oligo74-PAINT | ATGAATCAGCCGAACTGACCAACTTTGATGCCAGCATGGTTT**TCTTCACC** |
|  |  |
| ATTO655-PAINT | GGTGAAG**A**ATTO655 |
| BIOTIN | GGTAGTAATAGGAGAAT**G**bt |
